# Supplementary material for: Multiple gene genealogy reveals high genetic diversity and evidence for multiple origins of Chinese Plasmopara viticola population
Source: PubMed Central journal article supplement (PMC5725484; doi:10.1038/s41598-017-17569-7), 2017-12-11
Supplement: 41598_2017_17569_MOESM1_ESM.pdf [file 41598_2017_17569_MOESM1_ESM.pdf]

# **Multiple gene genealogy reveals high genetic diversity and evidence for multiple origins of Chinese *Plasmopara viticola* population**

Wei Zhang<sup>1,3+</sup>, Ishara S. Manawasinghe<sup>1,2+</sup>, Wensheng Zhao<sup>3</sup>, Jianping Xu<sup>4</sup>,  
Siraprapa Brooks<sup>5</sup>, Xueyan Zhao<sup>1</sup>, Kevin D. Hyde<sup>2</sup>, K.W. Thilini Chethana<sup>1,2</sup>,  
Jianhua Liu<sup>1</sup>, Xinghong Li<sup>1\*</sup>, Jiye Yan<sup>1\*</sup>

Supplementary Table S 1

Details of the *Plasmopara viticola* isolates used in the study

| Isolate Number                 | Grape cultivar                          | Location                  | GenBank No |          |          |          |
|--------------------------------|-----------------------------------------|---------------------------|------------|----------|----------|----------|
|                                |                                         |                           | ITS        | ACT      | TUB      | LSU      |
| JZB3100001 <sup>B, a,X,2</sup> | <i>V. vinifera</i>                      | PingGu, Beijing, China    | KY933859   | KY933798 | KY933985 | KY933922 |
| JZB3100002 <sup>B, a,Y,2</sup> | <i>V. vinifera</i>                      | PingGu, Beijing, China    | KY933860   | KY933799 | KY933986 | KY933923 |
| JZB3100003 <sup>B,b,W,2</sup>  | <i>V. vinifera</i>                      | PingGu, Beijing, China    | KY933861   | KY933800 | KY933987 | KY933924 |
| JZB3100004 <sup>B,b,Z,2</sup>  | <i>V. vinifera</i>                      | PingGu, Beijing, China    | KY933862   | KY933801 | KY933988 | KY933925 |
| JZB3100005 <sup>B,b,W,1</sup>  | <i>V. vinifera</i>                      | PingGu, Beijing, China    | KY933863   | KY933802 | -        | KY933926 |
| JZB3100006 <sup>B,b,W,2</sup>  | <i>V. vinifera</i>                      | PingGu, Beijing, China    | KY933873   | KY933812 | KY933998 | KY933936 |
| JZB3100007 <sup>B,b,W,5</sup>  | <i>V. vinifera</i>                      | PingGu, Beijing, China    | KY933905   | -        | KY934030 | KY933968 |
| JZB3100008 <sup>B,b,W,3</sup>  | <i>V. vinifera</i>                      | PingGu, Beijing, China    | KY933906   | KY933843 | KY934031 | KY933969 |
| JZB3100009 <sup>B,b,W,3</sup>  | <i>V. vinifera</i>                      | PingGu, Beijing, China    | KY933907   | KY933844 | KY934032 | KY933970 |
| JZB3100010 <sup>B,b,W,7</sup>  | <i>V. vinifera</i>                      | PingGu, Beijing, China    | KY933909   | KY933846 | KY934034 | KY933972 |
| JZB3100011 <sup>B,b,W,1</sup>  | <i>V. vinifera</i> × <i>V. labrusca</i> | PingGu, Beijing, China    | KF131672   | KF160772 | KF160812 | KF160851 |
| JZB3100012 <sup>B, b,W,1</sup> | <i>V. vinifera</i>                      | PingGu, Beijing, China    | KF131673   | KF160773 | KF160813 | KF160852 |
| JZB3100013 <sup>B,b,W,1</sup>  | <i>V. vinifera</i>                      | PingGu, Beijing, China    | KF131674   | KF160774 | KF160814 | KF160853 |
| JZB3100014 <sup>B,b,W,3</sup>  | <i>V. vinifera</i>                      | Changping, Beijing, China | KY933864   | KY933803 | KY933989 | KY933927 |
| JZB3100015 <sup>B,b,W,3</sup>  | <i>V. vinifera</i>                      | Changping, Beijing, China | KY933865   | KY933804 | KY933990 | KY933928 |
| JZB3100016 <sup>B,b,W,2</sup>  | <i>V. vinifera</i>                      | Changping, Beijing, China | KY933869   | KY933808 | KY933994 | KY933932 |
| JZB3100017 <sup>B,b,W,2</sup>  | <i>V. vinifera</i>                      | Changping, Beijing, China | KY933870   | KY933809 | KY933995 | KY933933 |
| JZB3100018 <sup>B,a,W,1</sup>  | <i>V. vinifera</i> × <i>V. labrusca</i> | Changping, Beijing, China | KF131649   | KF160749 | KF160789 | KF160829 |
| JZB3100019 <sup>B,b,W,1</sup>  | <i>V. vinifera</i>                      | Changping, Beijing, China | KF131650   | KF160750 | KF160790 | KF160830 |
| JZB3100020 <sup>B,b,W,1</sup>  | <i>V. vinifera</i> × <i>V. labrusca</i> | Changping, Beijing, China | KF131669   | KF160769 | KF160809 | KF160848 |

|                                |                                         |                           |           |          |          |          |
|--------------------------------|-----------------------------------------|---------------------------|-----------|----------|----------|----------|
| JZB3100021 <sup>B,b,W,1</sup>  | <i>V. vinifera</i>                      | Changping, Beijing, China | KF 131670 | KF160770 | KF160810 | KF160849 |
| JZB3100022 <sup>B,b,W,1</sup>  | <i>V. vinifera</i>                      | Changping, Beijing, China | KF131671  | KF160771 | KF160811 | KF160850 |
| JZB3100023 <sup>B,b,W,3</sup>  | <i>V. vinifera</i>                      | YanQing, Beijing, China   | KY933867  | KY933806 | KY933992 | KY933930 |
| JZB3100024 <sup>B, a,W,3</sup> | <i>V. vinifera</i>                      | YanQing, Beijing, China   | KY933868  | KY933807 | KY933993 | KY933931 |
| JZB3100025 <sup>B,b,W,2</sup>  | <i>V. vinifera</i>                      | YanQing, Beijing, China   | KY933871  | KY933810 | KY933996 | KY933934 |
| JZB3100026 <sup>B,b,W,2</sup>  | <i>V. vinifera</i>                      | YanQing, Beijing, China   | KY933872  | KY933811 | KY933997 | KY933935 |
| JZB3100027 <sup>B,b,W,1</sup>  | <i>V. vinifera</i>                      | YanQing, Beijing, China   | KF131643  | KF160743 | KF160783 | KF160826 |
| JZB3100028 <sup>B,b,W,1</sup>  | <i>V. vinifera</i>                      | YanQing, Beijing, China   | KF131644  | KF160744 | KF160784 | KF160827 |
| JZB3100029 <sup>B,b,W,1</sup>  | <i>V. vinifera</i> × <i>V. labrusca</i> | YanQing, Beijing, China   | KF131645  | KF160745 | KF160785 | KF160822 |
| JZB3100030 <sup>B,b,W,1</sup>  | <i>V. vinifera</i>                      | YanQing, Beijing, China   | KF131657  | KF160757 | KF160797 | KF160837 |
| JZB3100031 <sup>B,a,W,1</sup>  | <i>V. vinifera</i>                      | YanQing, Beijing, China   | KF131658  | KF160758 | KF160798 | KF160838 |
| JZB3100032 <sup>B,b,W,1</sup>  | <i>V. vinifera</i> × <i>V. labrusca</i> | YanQing, Beijing, China   | KF131659  | KF160759 | KF160799 | KF160839 |
| JZB3100033 <sup>B,b,W,1</sup>  | <i>V. vinifera</i>                      | YanQing, Beijing, China   | KF131660  | KF160760 | KF160800 | KF160840 |
| JZB3100034 <sup>B,b,W,1</sup>  | <i>V. vinifera</i>                      | YanQing, Beijing, China   | KF131661  | KF160761 | KF160801 | KF160841 |
| JZB3100035 <sup>B,a,W,1</sup>  | <i>V. vinifera</i>                      | YanQing, Beijing, China   | KF131662  | KF160762 | KF160802 | KF160842 |
| JZB3100036 <sup>B,a,W,1</sup>  | <i>V. vinifera</i>                      | YanQing, Beijing, China   | KF131663  | KF160763 | KF160803 | KF160843 |
| JZB3100037 <sup>B,b,W,1</sup>  | <i>V. vinifera</i>                      | YanQing, Beijing, China   | KF131664  | KF160764 | KF160804 | KF160844 |
| JZB3100038 <sup>B, a,W,1</sup> | <i>V. vinifera</i>                      | YanQing, Beijing, China   | KF131665  | KF160765 | KF160805 | -        |
| JZB3100039 <sup>B, a,W,1</sup> | <i>V. vinifera</i> × <i>V. labrusca</i> | YanQing, Beijing, China   | KF131666  | KF160766 | KF160806 | KF160845 |
| JZB3100040 <sup>B,b,W,1</sup>  | <i>V. vinifera</i>                      | YanQing, Beijing, China   | KF131667  | KF160767 | KF160807 | KF160846 |
| JZB3100041 <sup>B, a,W,1</sup> | <i>V. vinifera</i>                      | YanQing, Beijing, China   | KF131668  | KF160768 | KF160808 | KF160847 |
| JZB3100042 <sup>B,b,Z,4</sup>  | <i>V. vinifera</i>                      | Haidian, Beijing, China   | KY933866  | KY933805 | KY933991 | KY933929 |

|                                |                    |                          |          |          |          |          |
|--------------------------------|--------------------|--------------------------|----------|----------|----------|----------|
| JZB3100043 <sup>B,b,W,1</sup>  | <i>V. vinifera</i> | Haidian, Beijing, China  | KY933895 | KY933833 | KY934020 | KY933958 |
| JZB3100044 <sup>B,b,W,2</sup>  | <i>V. vinifera</i> | Haidian, Beijing, China  | KY933896 | KY933834 | KY934021 | KY933959 |
| JZB3100045 <sup>B,b,W,2</sup>  | <i>V. vinifera</i> | Haidian, Beijing, China  | KY933897 | KY933835 | KY934022 | KY933960 |
| JZB3100046 <sup>B,b,W,2</sup>  | <i>V. vinifera</i> | Haidian, Beijing, China  | KY933899 | KY933836 | KY934023 | KY933961 |
| JZB3100047 <sup>B,a,W,2</sup>  | <i>V. vinifera</i> | Haidian, Beijing, China  | KY933899 | KY933837 | KY934024 | KY933962 |
| JZB3100048 <sup>B,a,W,2</sup>  | <i>V. vinifera</i> | Haidian, Beijing, China  | KY933900 | KY933838 | KY934025 | KY933963 |
| JZB3100049 <sup>B,b,W,6</sup>  | <i>V. vinifera</i> | Haidian, Beijing, China  | KY933908 | KY933845 | KY934033 | KY933971 |
| JZB3100050 <sup>B,a,W,1</sup>  | <i>V. vinifera</i> | Haidian, Beijing, China  | KF131640 | KF220645 | KF160780 | KF160823 |
| JZB3100051 <sup>B,,a,W,1</sup> | <i>V. vinifera</i> | Haidian, Beijing, China  | KF131641 | KF160742 | KF160781 | KF160824 |
| JZB3100052 <sup>B,b,W,1</sup>  | <i>V. vinifera</i> | Haidian, Beijing, China  | KF131642 | KF220644 | KF160782 | KF160825 |
| JZB3100053 <sup>B,b,W,1</sup>  | <i>V. vinifera</i> | Haidian, Beijing, China  | KF131655 | KF160755 | KF160795 | KF160835 |
| JZB3100054 <sup>B,b,W,1</sup>  | <i>V. vinifera</i> | Haidian, Beijing, China  | KF131656 | KF160756 | KF160796 | KF160836 |
| JZB3100055 <sup>B,b,W,1</sup>  | <i>V. vinifera</i> | Fangshan, Beijing, China | KF131651 | KF160751 | KF160791 | KF160831 |
| JZB3100056 <sup>B,b,W,1</sup>  | <i>V. vinifera</i> | Fangshan, Beijing, China | KF131652 | KF160752 | KF160792 | KF160832 |
| JZB3100057 <sup>B,b,W,1</sup>  | <i>V. vinifera</i> | Fangshan, Beijing, China | KF131653 | KF160753 | KF160793 | KF160833 |
| JZB3100058 <sup>B,b,W,1</sup>  | <i>V. vinifera</i> | Fangshan, Beijing, China | KF131654 | KF160754 | KF160794 | KF160834 |
| JZB3100059 <sup>B,b,W,1</sup>  | <i>V. vinifera</i> | TongZhou, Beijing, China | KF131646 | KF160746 | KF160786 | KF160820 |
| JZB3100060 <sup>B,b,W,1</sup>  | <i>V. vinifera</i> | TongZhou, Beijing, China | KF131647 | KF160747 | KF160787 | KF160820 |
| JZB3100061 <sup>B,b,W,1</sup>  | <i>V. vinifera</i> | TongZhou, Beijing, China | KF131648 | KF160748 | KF160788 | KF160828 |
| JZB3100062 <sup>B,b,W,1</sup>  | <i>V. vinifera</i> | TongZhou, Beijing, China | KF131675 | KF160775 | KF160815 | KF160854 |
| JZB3100063 <sup>B,b,W,1</sup>  | <i>V. vinifera</i> | TongZhou, Beijing, China | KF131676 | KF160776 | KF160786 | KF160855 |
| JZB3100064 <sup>B,b,W,1</sup>  | <i>V. vinifera</i> | DaXing, Beijing, China   | KF131677 | KF160777 | KF160817 | KF160856 |

|                                  |                                         |                        |          |          |          |          |
|----------------------------------|-----------------------------------------|------------------------|----------|----------|----------|----------|
| JZB3100065 <sup>B, a, W, 1</sup> | <i>V. vinifera</i> × <i>V. labrusca</i> | DaXing, Beijing, China | KF131678 | KF160778 | KF160818 | KF160857 |
| JZB3100066 <sup>B, a, W, 1</sup> | <i>V. vinifera</i>                      | DaXing, Beijing, China | KF131679 | KF160779 | KF160819 | KF160858 |
| JZB3100067 <sup>A, b, W, 2</sup> | <i>V. vinifera</i>                      | Guanxi, China          | KY933874 | KY933813 | KY933999 | KY933937 |
| JZB3100068 <sup>A, b, W, 2</sup> | <i>V. vinifera</i>                      | Guanxi, China          | KY933875 | KY933814 | KY934000 | KY933938 |
| JZB3100069 <sup>A, b, W, 2</sup> | <i>V. vinifera</i>                      | Guanxi, China          | KY933876 | KY933815 | KY934001 | KY933939 |
| JZB3100070 <sup>B, b, W, 2</sup> | <i>V. vinifera</i>                      | Ningxia, China         | KY933877 | KY933816 | KY934002 | KY933940 |
| JZB3100071 <sup>B, b, W, 2</sup> | <i>V. vinifera</i>                      | Ningxia, China         | KY933878 | KY933817 | KY934003 | KY933941 |
| JZB3100072 <sup>B, a, W, 2</sup> | <i>V. vinifera</i>                      | Ningxia, China         | KY933879 | KY933818 | KY934004 | KY933942 |
| JZB3100073 <sup>B, b, W, 2</sup> | <i>V. vinifera</i>                      | Ningxia, China         | KY933880 | KY933819 | KY934005 | KY933943 |
| JZB3100074 <sup>B, b, W, 2</sup> | <i>V. vinifera</i>                      | Ningxia, China         | KY933880 | KY933820 | KY934006 | KY933944 |
| JZB3100075 <sup>B, b, W, 2</sup> | <i>V. vinifera</i>                      | Hebei, China           | KY933882 | KY933821 | KY934007 | KY933945 |
| JZB3100076 <sup>B, a, W, 2</sup> | <i>V. vinifera</i>                      | Hebei, China           | KY933883 | -        | KY934008 | KY933946 |
| JZB3100077 <sup>B, a, W, 2</sup> | <i>V. vinifera</i>                      | Hebei, China           | KY933884 | KY933822 | KY934009 | KY933947 |
| JZB3100078 <sup>B, b, W, 3</sup> | <i>V. vinifera</i>                      | Hebei, China           | KY933904 | KY933842 | KY934029 | KY933967 |
| JZB3100079 <sup>B, b, Z, 3</sup> | <i>V. vinifera</i>                      | Hebei, China           | KY933901 | KY933839 | KY934026 | KY933964 |
| JZB3100080 <sup>B, a, W, 2</sup> | <i>V. vinifera</i>                      | Shanxi, China          | KY933885 | KY933823 | KY934010 | KY933948 |
| JZB3100081 <sup>B, a, W, 2</sup> | <i>V. vinifera</i>                      | Shanxi, China          | KY933886 | KY933824 | KY934011 | KY933949 |
| JZB3100082 <sup>A, a, W, 2</sup> | <i>V. vinifera</i>                      | NM,                    | KY933887 | KY933825 | KY934012 | KY933950 |
| JZB3100083 <sup>A, b, W, 2</sup> | <i>V. vinifera</i>                      | NM,                    | KY933888 | KY933826 | KY934013 | KY933951 |
| JZB3100084 <sup>A, a, W, 2</sup> | <i>V. vinifera</i>                      | NM,                    | KY933889 | KY933827 | KY934014 | KY933952 |
| JZB3100085 <sup>A, b, W, 2</sup> | <i>V. vinifera</i>                      | NM,                    | KY933890 | KY933828 | KY934015 | KY933953 |
| JZB3100086 <sup>B, b, W, 2</sup> | <i>V. vinifera</i>                      | Liaoning, China        | KY933892 | KY933830 | KY934017 | KY933955 |

|                               |                    |                 |          |          |          |          |
|-------------------------------|--------------------|-----------------|----------|----------|----------|----------|
| JZB3100087 <sup>B,b,Z,2</sup> | <i>V. vinifera</i> | Liaoning, China | KY933893 | KY933831 | KY934018 | KY933956 |
| JZB3100088 <sup>B,b,W,2</sup> | <i>V. vinifera</i> | Liaoning, China | KY933894 | KY933832 | KY934019 | KY933957 |
| JZB3100089 <sup>B,b,W,3</sup> | <i>V. vinifera</i> | Liaoning, China | KY933902 | KY933840 | KY934027 | KY933965 |
| JZB3100090 <sup>B,b,W,3</sup> | <i>V. vinifera</i> | Liaoning, China | KY933903 | KY933841 | KY934028 | KY933966 |
| JZB3100091 <sup>A,b,W,8</sup> | <i>V. vinifera</i> | Hunan, China    | KY933910 | KY933847 | KY934035 | KY933973 |
| JZB3100092 <sup>A,b,W,8</sup> | <i>V. vinifera</i> | Hunan, China    | KY933911 | KY933848 | KY934036 | KY933974 |
| JZB3100093 <sup>A,b,W,8</sup> | <i>V. vinifera</i> | Hunan, China    | KY933912 | KY933849 | KY934037 | KY933975 |
| JZB3100094 <sup>A,b,W,8</sup> | <i>V. vinifera</i> | Hunan, China    | KY933913 | KY933850 | KY934038 | KY933976 |
| JZB3100095 <sup>A,b,W,1</sup> | <i>V. vinifera</i> | Hunan, China    | KY933891 | KY933829 | KY934016 | KY933954 |
| JZB3100096 <sup>B,b,W,9</sup> | <i>V. vinifera</i> | Zhejiang, China | KY933914 | KY933851 | KY934039 | KY933977 |
| JZB3100097 <sup>B,b,W,9</sup> | <i>V. vinifera</i> | Zhejiang, China | KY933915 | KY933852 | KY934040 | KY933978 |
| JZB3100098 <sup>B,b,W,9</sup> | <i>V. vinifera</i> | Zhejiang, China | KY933916 | KY933853 | KY934041 | KY933979 |
| JZB3100099 <sup>B,b,W,9</sup> | <i>V. vinifera</i> | Zhejiang, China | KY933917 | KY933854 | KY934042 | KY933980 |
| JZB3100100 <sup>B,b,W,9</sup> | <i>V. vinifera</i> | Zhejiang, China | KY933918 | KY933855 | KY934043 | KY933981 |
| JZB3100101 <sup>B,b,W,9</sup> | <i>V. vinifera</i> | Zhejiang, China | KY933919 | KY933856 | KY934044 | KY933982 |
| JZB3100102 <sup>B,b,W,9</sup> | <i>V. vinifera</i> | Zhejiang, China | KY933920 | KY933857 | KY934045 | KY933983 |
| JZB3100103 <sup>B,b,W,9</sup> | <i>V. vinifera</i> | Zhejiang, China | KY933921 | KY933858 | KY934038 | KY933984 |
|                               |                    |                 |          |          |          |          |

A subtropical population and B temperate population, a-b haplotypes obtained from ITS, w-z haplotypes obtained from ACT and 1-9 haplotypes obtained from TUB. The bold letters indicates isolates used in Phylogenetic analysis and haplotype network construction.
